# Supplementary material for: Investigation of the carbon dioxide adsorption behavior and the heterogeneous catalytic efficiency of a novel Ni-MOF with nitrogen-rich channels
Source: Royal Society of Chemistry journal article supplement (doi:10.1039/d0ra05233g), 2020-01-01
Supplement: d0ra05233g1.pdf [file d0ra05233g1.pdf]

## Investigation of the carbon dioxide sorption behavior and heterogeneous catalytic efficiency by a new Ni-MOF with nitrogen-rich channels

Sima Aryanejad <sup>a</sup>, Naser Valipour Motlagh <sup>a1</sup>

<sup>a</sup> Department of Chemistry, Faculty of Science, University of Birjand, Birjand, Iran

### Synthesis of 4,4',4''-s-triazine-2,4,6-triyl-tribenzoic acid (H<sub>3</sub>TATB)

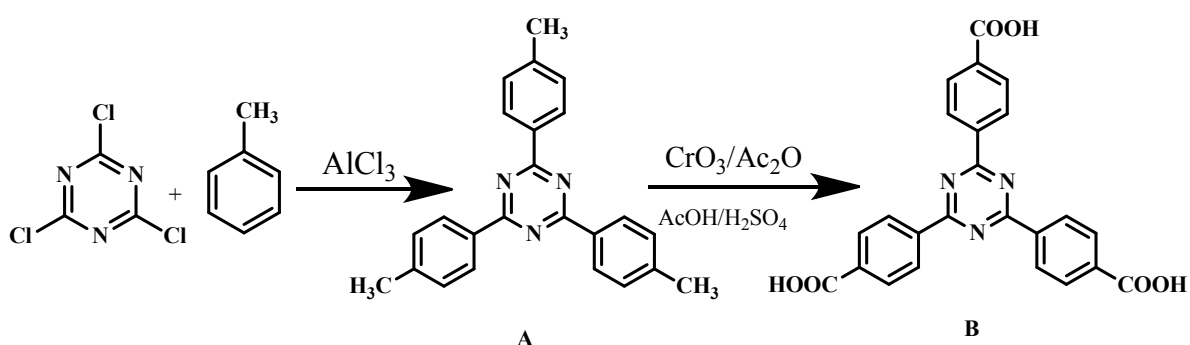

Scheme S1: Synthetic procedures of H<sub>3</sub>TATB

#### Synthesis of A:

AlCl<sub>3</sub> (20 g) was added into a 250 ml three-connected flask containing dry toluene (50 ml). C<sub>3</sub>N<sub>3</sub>Cl<sub>3</sub> (8.3 g) was then added gradually at 60 °C. After that, the mixture was stirred overnight. To quenching catalyst, the resulting red sticky oil was poured into a large amount of ice water. The water layer was decanted by adding CHCl<sub>3</sub> (100 mL), and the organic layer was filtered. Methanol was added into CHCl<sub>3</sub> to precipitate some needle-like solid. The rest of the solid was dissolved in hot toluene, then place in refrigerator to afford white needle-like crystalline solids. <sup>1</sup>H NMR (δ, CDCl<sub>3</sub>): 2.46 (s, 9 H), 7.35 (d, 6 H), 8.64 (d, 6H).

#### Synthesis of H<sub>3</sub>TATB:

Compound C (2.78 g) was dissolved in acetic acid (70 mL), and H<sub>2</sub>SO<sub>4</sub> (4.4 mL) was added it. Chromium oxide (7.2 g) was dissolved in acetic anhydride (4.8 mL) with stirring, which was then added into the previous mixture slowly, using a cold water ice bath to keeping the temperature below 50 °C. The black-brown slurry mixture was stirred overnight. After that, the resulting was poured into cold water (300 mL), stirred for 1h, and then filtered. For remove

\* Corresponding author: n.valipour.m@birjand.ac.ir, nasservalipoormotlagh@gmail.com,  
Tell: 0989153636841, Fax: 098-5632202515

chromium acid, the solid was washed with water. Then, the white precipitate was dissolved in NaOH solution (200 mL, 2N). The unreacted starting material was removed by filtration, the solution was acidified (pH<3) with HCl solution (10%) to give white crude product precipitate. The final product was filtered and dried in an oven. Recrystallization of the product with DMF gave the pure product as a white solid. FTIR (cm<sup>-1</sup>): 3115, 2770, 2474, 1716, 1490, 1405, 1065, 809, 768. <sup>1</sup>H NMR (400 MHz, d<sub>6</sub>-DMSO, δ): 7.96 (d, 6 H), 8.41 (d, 6 H), 13.13 (br, 3H). <sup>13</sup>C NMR (100 MHz, d<sub>6</sub>-DMSO, δ): 128.85, 129.91, 134.87, 138.74, 167.13, 170.45.

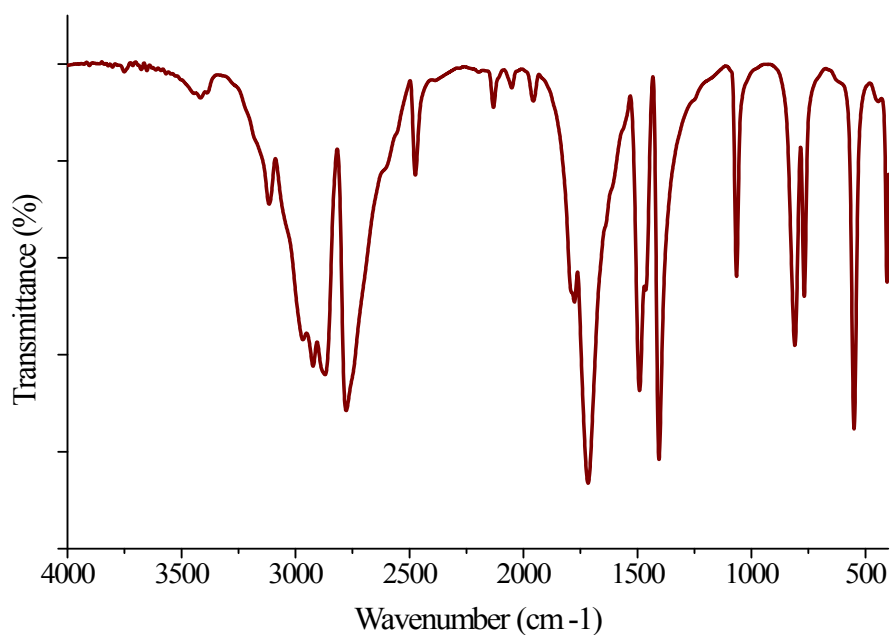

Figure S1: FT-IR spectrum of H<sub>3</sub>TATB

Arynejad- code 17-sa-

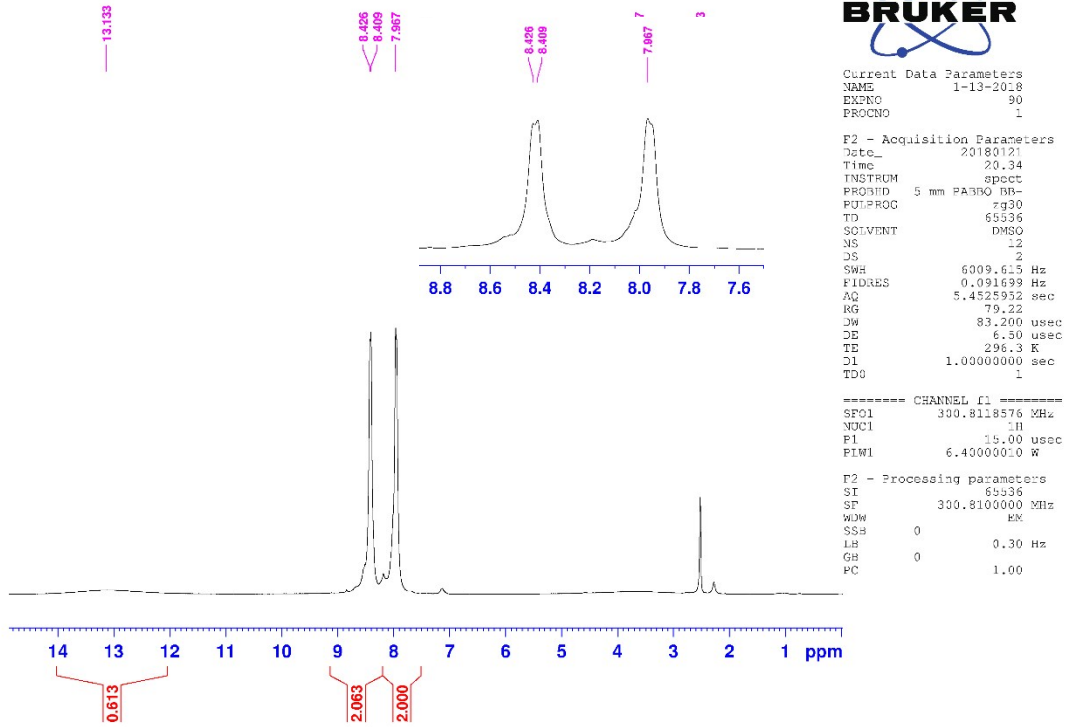

Figure S2: <sup>1</sup>H-NMR of H<sub>3</sub>TATB

C13-Dr.Valigpour- code 17 S.A(aryanejad)-test

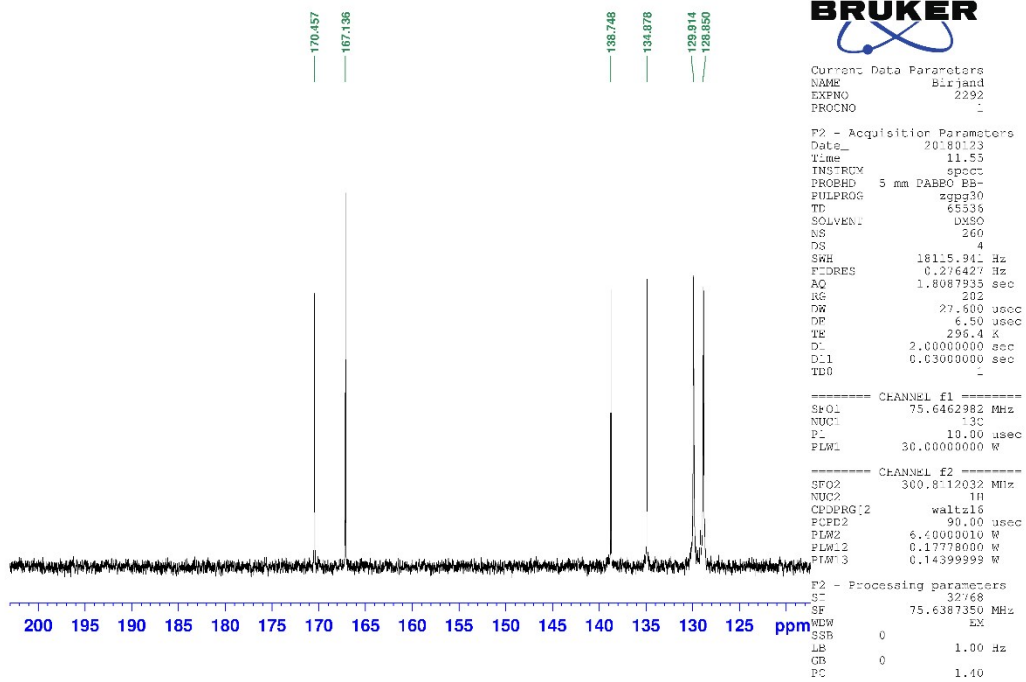

Figure S3: <sup>13</sup>C-NMR of H<sub>3</sub>TATB
